# Supplementary material for: One-pot transformation of furfural into γ-valerolactone catalyzed by a hierarchical Hf-Al-USY zeolite with balanced Lewis and Brønsted acid sites
Source: Royal Society of Chemistry journal article supplement (doi:10.1039/d1se00942g), 2021-01-01
Supplement: d1se00942g1.pdf [file d1se00942g1.pdf]

# One-pot transformation of furfural into $\gamma$ -valerolactone catalyzed by hierarchical Hf-Al-USY zeolite with balanced Lewis and Brønsted acid sites

Bo Tang, Shuang Li, Wei-Chao Song, Yan Li, En-Cui Yang\*

*Tianjin Key Laboratory of Structure and Performance for Functional Molecules, College of Chemistry, Tianjin Normal University, Tianjin 300387, People's Republic of China*

\*Corresponding author

E-mail address: encui\_yang@163.com

**Initial reaction rate:** In the present study, the initial reaction rate  $k_1$  for the target reaction was defined as moles of formed product divided by gram of catalyst per reaction time (conversion not exceeding 30%), as shown below.

For the reduction of FA to FOL,  $k_1$  ( $\text{molh}^{-1}\text{g}^{-1}$ ) =  
$$\frac{\text{moles of FOL formed}}{\text{amount of catalyst} \times \text{reaction time}}$$

For FOL conversion to IPL,  $k_2$  ( $\text{molh}^{-1}\text{g}^{-1}$ ) =

$$\frac{\text{moles of IPL formed}}{\text{amount of catalyst} \times \text{reaction time}} = \frac{\text{moles of GVL formed}}{\text{amount of catalyst} \times \text{reaction time}} \quad \text{For IPL lactonization to GVL, } k_3 \quad (\text{molh}^{-1}\text{g}^{-1}) =$$

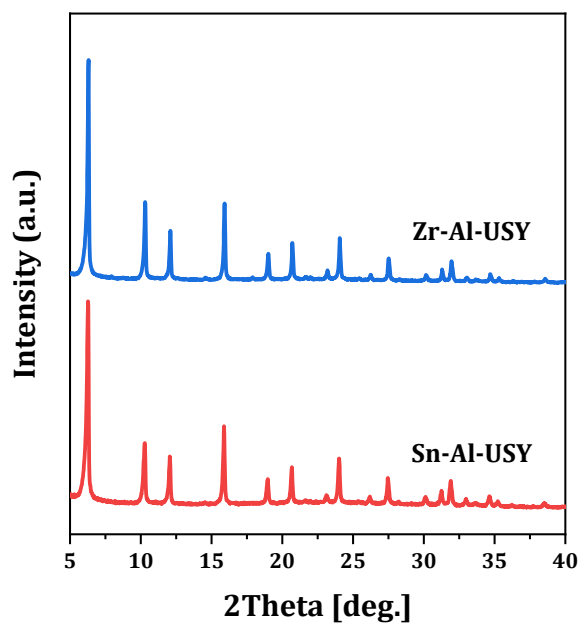

Fig. S1 XRD patterns of Sn-Al-USY and Zr-Al-USY.

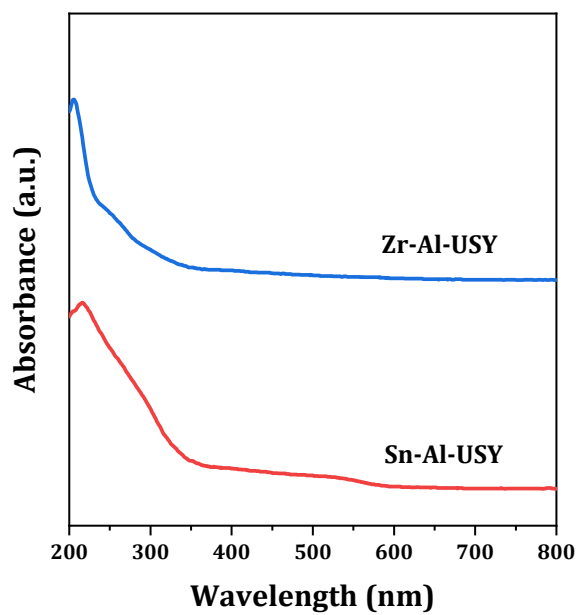

Fig. S2 UV-vis spectra of Sn-Al-USY and Zr-Al-USY.

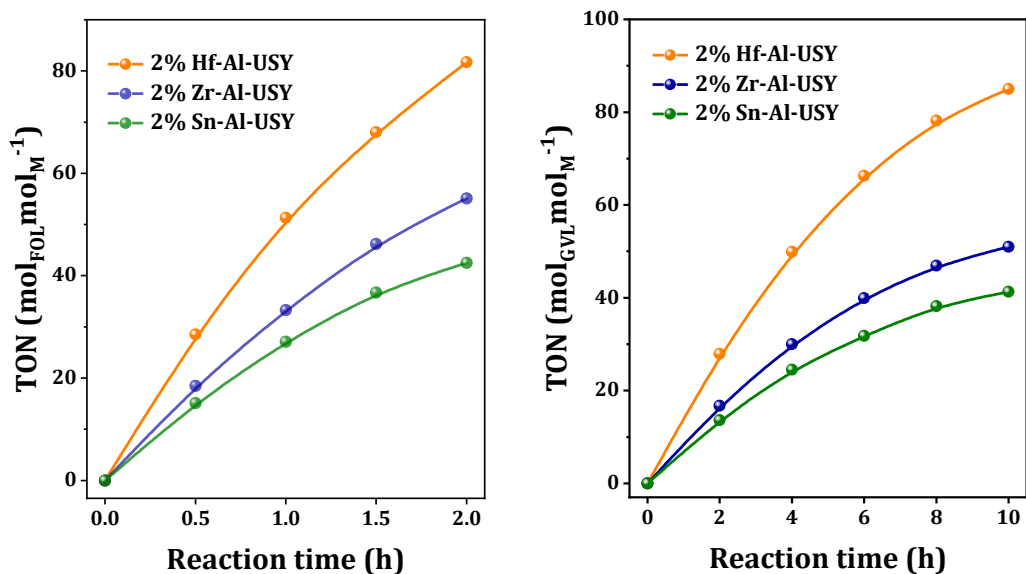

**Fig. S3** Time-dependent conversion of FA (left chart) and LA (right chart) over 2% Hf-Al-USY, 2% Zr-Al-USY and 2% Sn-Al-USY zeolites. Reaction conditions: 1 mmol substrate, 5 mL solvent, 100 mg catalyst, 1.0 MPa N<sub>2</sub>; 373 K for FA conversion and 423 K for LA conversion, respectively.

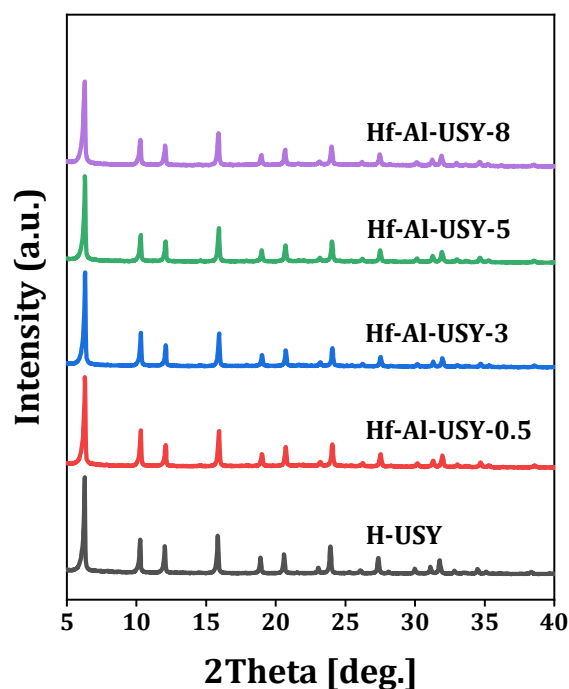

**Fig. S4** XRD patterns of Hf-Al-USY zeolites prepared from different acid treatment time.

All the samples exhibited identical diffraction peaks with comparable intensity, indicating the framework integrity of USY framework during the post-synthesis procedures. Such a result can be explained by the fact that calcination of parent H-USY at a high temperature, i.e. 1073 K, can effectively improve its framework stability against destruction when treating with nitric acid aqueous solution.

**Table S1** Physicochemical properties of zeolite samples under study.

| Sample                     | Surface area ( $\text{m}^2 \text{g}^{-1}$ ) |                               |                   | Pore volume ( $\text{cm}^3 \text{g}^{-1}$ ) |                               |                   |
|----------------------------|---------------------------------------------|-------------------------------|-------------------|---------------------------------------------|-------------------------------|-------------------|
|                            | $S_{\text{BET}}$                            | $S_{\text{micro}}^{\text{a}}$ | $S_{\text{meso}}$ | $V_{\text{total}}$                          | $V_{\text{micro}}^{\text{b}}$ | $V_{\text{meso}}$ |
| H-USY                      | 835                                         | 740                           | 95                | 0.40                                        | 0.29                          | 0.11              |
| DeAl-USY                   | 985                                         | 772                           | 213               | 0.54                                        | 0.30                          | 0.24              |
| Hf-Al-USY-0.5 <sup>c</sup> | 928                                         | 758                           | 170               | 0.49                                        | 0.29                          | 0.20              |
| Hf-Al-USY-1 <sup>c</sup>   | 975                                         | 769                           | 206               | 0.53                                        | 0.30                          | 0.23              |
| Hf-Al-USY-3 <sup>c</sup>   | 941                                         | 723                           | 218               | 0.54                                        | 0.29                          | 0.25              |
| Hf-Al-USY-5 <sup>c</sup>   | 935                                         | 715                           | 220               | 0.56                                        | 0.28                          | 0.28              |
| Hf-Al-USY-8 <sup>c</sup>   | 948                                         | 703                           | 245               | 0.56                                        | 0.26                          | 0.30              |
| Sn-Al-USY                  | 979                                         | 769                           | 210               | 0.52                                        | 0.29                          | 0.23              |
| Zr-Al-USY                  | 982                                         | 775                           | 207               | 0.53                                        | 0.29                          | 0.24              |

|                          |     |     |     |      |      |      |
|--------------------------|-----|-----|-----|------|------|------|
| Hf-Al-USY-R <sup>d</sup> | 763 | 628 | 135 | 0.45 | 0.27 | 0.18 |
|--------------------------|-----|-----|-----|------|------|------|

<sup>a</sup> The specific surface area was obtained by the BET method. <sup>b</sup> Calculated from the *t*-plot ( $t = [13.99/(0.034 - \log(p/p_0))]^{0.5}$ ) at a relative pressure  $p/p_0$  of 0.55-0.8. <sup>c</sup> Parent H-USY was treated with nitric acid solution at 358 K for *n* h ( $n = 0.5, 1, 3, 5, 8$ ). <sup>d</sup> Hf-Al-USY-R indicated reused Hf-Al-USY sample.
